# Supplementary material
Source: Springer Nature journal article supplement (https://www.springermedizin.de/resource/supplementary/12936_2014_3388_MOESM3_ESM.pdf/9545776)
Supplement: MOESM3 [file 9545776]

**ESTIMATED UTILIZATION RATE FOR THE INTERVENTION-TARGETTED RESOURCE SUBSET**

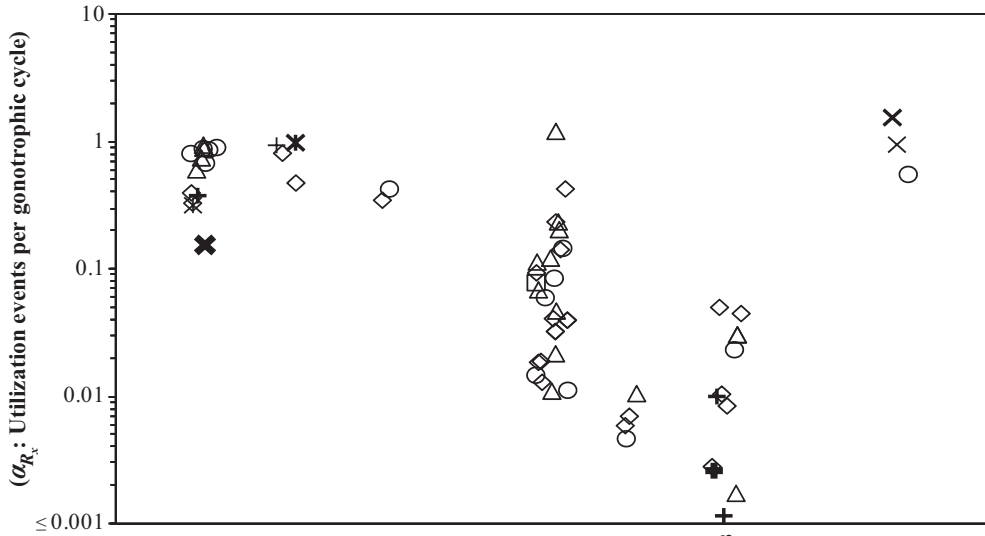

- ◇ *An. arabiensis*
- × *An. claviger*
- + *An. culifacies*
- \* *An. darlingi*
- + *An. farauti*
- △ *An. funestus*
- *An. gambiae*
- *An. melas*
- \* *An. nuneztovari*
- × *An. sergenti*
- \* *An. stephensi*
- *An. sundaicus*

Humans while indoors  
Livestock  
Odor-baited traps

**Blood hosts and pseudo-hosts**

Indoor house surfaces  
Indoor pots/boxes  
Outdoor pots/boxes/screens

**Resting sites**

Attractive baits

**Sugar**
